# Supplementary material for: Methane retrieval from MethaneAIR using the CO 2 Proxy Approach: A demonstration for the upcoming MethaneSAT mission
Source: Copernicus journal article supplement (doi:10.5194/egusphere-2023-1962), 2023-10-06
Supplement: Supplementary file [file egusphere-2023-1962-AC1-supplement.pdf]

## Authors' Response to Reviews of

# Methane retrieval from MethaneAIR using the CO<sub>2</sub> Proxy Approach: A demonstration for the upcoming MethaneSAT mission

---

RC: Reviewers' Comment, AR: Authors' Response,  Manuscript Text

### 1. General Comment

**RC:** *This paper describes the XCH<sub>4</sub> retrieval algorithm used for the MethaneAIR airborne remote sensing instrument to detect and quantify CH<sub>4</sub> emissions. The algorithm uses the CO<sub>2</sub> proxy method to eliminate light path errors due to aerosols. The quality of the retrieved XCH<sub>4</sub> maps is assessed, and corrections for changes in the ISRF, a destriping algorithm, and a well-described denoising algorithm are introduced. Additionally, the detection limit of the combination of MethaneAIR and the CO<sub>2</sub> proxy approach is estimated. Finally, the emissions of several plumes detected during measurement flights are calculated with the IME method adapted to MethaneAIR. The paper provides valuable information about the retrieval algorithm and post-processing of the retrieved XCH<sub>4</sub> maps, with promising results for future flights of the instrument. I recommend publication after the following partly major comments have been addressed.*

**AR:** We thank the reviewer for their constructive comments and suggestions. Our responses are given below.

### 2. Conceptual/Broader concerns

**RC:** *The background of airborne remote sensing measurements of greenhouse gases needs to be referenced appropriately, with the MAMAP instrument being the first airborne remote sensing instrument to determine emissions from point and small areal sources (e.g., Krings et al., 2011, Gerilowski et al., 2011, Krautwurst et al., 2017, Krings et al., 2018). Relevant work of the airborne remote sensing instruments AVIRIS-NG and GHGSat-Airborne should be included, too. The relevant publications for the satellite remote sensing instruments GHGSat, Prisma, ENMAP, Sentinel-2, CO<sub>2</sub>M, and Carbon Mapper might also be referenced explicitly, as often a link is made to the satellite system MethaneSat. A corresponding statement on how MethaneSAT fits in this fleet of satellites needs to be included.*

**AR:** We have updated the text to reference MAMAP

Here we present results from the maiden flight campaign of MethaneAIR using the operational MethaneSAT CO<sub>2</sub>-proxy retrieval. This is expected to be the primary retrieval used for emissions inversions. The CO<sub>2</sub>-Proxy method was first used from an airborne platform by the MAMAP instrument (Krings et al., 2011; Gerilowski et al., 2011), which provided the first remote-sensed estimates of CH<sub>4</sub> and CO<sub>2</sub> point/small-area sources (Krautwurst et al., 2017; Krings et al., 2018). MethaneAIR builds on this heritage by substantially increasing the sensors rate spatial coverage, mapping approximately 490×

the area per unit time relative to MAMAP: This is achieved by its higher nominal operating altitude (12 km vs 1.25 km), faster aircraft speed/exposure time (720 vs. 200 km h<sup>-1</sup>/ 0.1s vs. 0.6s), and its configuration as a push-broom scanner (983 vs. 1 across track pixels). This allows complete mapping of a typical sized oil and gas basin in a few hours of flight time.

The references for most of the aircraft/satellite instruments mentioned were cited but not always explicitly named. We have updated the introduction now to make this clear.

Recently instruments designed to detect high concentrations of CH<sub>4</sub> in individual methane plumes have been deployed on aircraft (AVIRIS-Thorpe et al. (2012), AVIRIS-NG-Thorpe et al. (2016), HySpex-Hochstaffl et al. (2023)) and satellites (Sentinel 2-Varon et al. (2021), GHGSat-Jervis et al. (2021), CarbonMapper-Shivers et al. (2021), PRISMA-Guanter et al. (2021), EnMAP-Roger et al. (2024)) to estimate emission rates from point sources.

We believe the introduction already mentions how MethaneSAT fits into the existing set of satellite sensors. We repeat the relevant paragraph here, and attach the reference to CO2M

MethaneSAT has been designed to fill the gap between space-borne global flux mappers and point-source imaging instruments. It contains a pair of 2-D grating spectrometers with a similar spectral resolution to TROPOMI, covering the 1.27 μm O<sub>2</sub> singlet delta ( $a^1\Delta_g \leftarrow X^3\Sigma_g^-$ ) and 1.65 μm ( $2\nu_3$ ) CH<sub>4</sub> bands. Rather than acquiring a broad swath to achieve daily global coverage like TROPOMI and upcoming missions such as CO2M (Sierk et al., 2019), it is maneuverable and built to target scenes at the approximate scale of an O&G production basin (200 × 200 km<sup>2</sup> at nadir, for a 30 s collect). By concentrating pixels onto the smaller acquisition area it achieves a pixel size of 130 × 400 m<sup>2</sup> in its nominal operational mode, enabling CH<sub>4</sub> to be retrieved at the accuracy of a TROPOMI like instrument, but with a spatial resolution capable of imaging individual plumes from point sources.

**RC:** *The algorithm is not sufficiently described. It is unclear what mathematical basis is used, especially which regularization and optimizer were chosen (e.g., Gauss-Newton, Levenber-Marquardt, ...). Similarly, the convergence criterion is unclear. As this is the first publication of the algorithm, more information should also be added for the forward model, which, to my understanding, is an absorption-only case that should easily be written down as a formula. This is especially important as you do not only use a polynomial for albedo but also for an additive offset if I interpret it correctly (it is never stated explicitly). Why is this additional polynomial included? Do you include a spectral shift fitting parameter in your retrieval? In the current state, the state vector cannot be connected to the forward model in the current state of the description. Finally, I wonder why no theoretical sensitivity study of the algorithm w.r.t. differences in other atmospheric parameters that are not part of the state vector (different albedo types, aerosols, surface elevation, and aircraft altitude changes, as an example) has been conducted. Is a theoretical sensitivity study part of another manuscript currently in preparation?*

**AR:** We omitted such details as they are generally unusual in the main body of a research article (it is usually left to ATBDs). Since we currently do not have one to refer to, I have expanded Section 1 in the supplement to include such details, including how all state vector variables are included in the spectral fit and optimizer choice.

With regard to the additive offset, it is included to account for broad band stray light, which was present in-part due to the impact of temperature-induced defocusing. We know that it exists based on monitoring signals in the unilluminated part of the detector.

With regard to the retrieval sensitivities, we expect these to be similar to those described in satellite proxy sensitivity studies e.g. Butz et al. (2010) (the geometries and sources of bias e.g. aerosol/surface interactions are not dissimilar due to the high nominal plane observation altitude). In this case the largest difference is probably reduced sensitivity to stratospheric CO<sub>2</sub>/CH<sub>4</sub> concentrations. A sensitivity analysis is part of another manuscript in preparation, the focus of which is comparing proxy normalization by CO<sub>2</sub> and from the O<sub>2</sub>-singlet delta band. We believed it was important to publish this as a reference to the main algorithm, given the public availability of data from the first campaign and the impending launch of the satellite.

**RC:** *For the estimation of the detection limit, there are still a few questions open:*

- 1. How do you treat the background? Do you overlay the simulated plume over real data? Or do you also simulate the background?*
- 2. How do you treat measurement noise in the simulation? Is it added afterward?*
- 3. What is the emission rate assumed for the LES simulation?*

AR:

1. We assume that the background concentration can be subtracted based on the estimate from sigma-clipped mean described in the text. In general there are enough points within the scene such that the random error is negligible. It would only be an issue if a significant portion of the scene was above background levels.
2. Measurement noise (normally distributed, 35ppbv standard deviation) is added on top of the simulation, based on the validation section, which indicated that errors in the retrieval are mostly random, with no strong dependence on surface reflectance
3. The emission rate in the base simulation was 998 kg h<sup>-1</sup>. However this is not really relevant as CH<sub>4</sub> is transported as a passive tracer, so scaling the concentration field is equivalent to scaling the emission and rerunning the exact same simulation.

**RC:** *A thorough uncertainty propagation has to be included for the emission rates and detection limit considerations. The emission estimates in the later parts of the paper are given without any uncertainty range. From the numbers stated in the article, and given that you take the wind from models, there is likely significant uncertainty due to that alone, but also from retrieval precision, and maybe uncertainty in missed parts of the plume may contribute. Please add an uncertainty breakdown to the emission estimates. Also, for IME, you state that you are close to the 1%-case stated in Varon et al., 2018. However, with 1.9% precision, the uncertainty likely is larger than the 70 kg h<sup>-1</sup> + 5% stated in the paper. Is an according analysis for a ~2% precision instrument planned?*

AR: We have updated the numbers in the manuscript to include the uncertainty ranges for the emissions estimates for the Mi Vida gas plant and pipeline leak. The emissions estimates have also been updated to reflect the current IME estimates (the previous manuscript used an earlier version). The uncertainties are based upon the the 2.5-97.5 percentile interval of the monte carlo simulation of the errors as described in Chulakadaba et al. (2023). This includes contributions caused by variance in the winds and retrieval errors, but they are difficult to separate due to the calculation method.

The Varon case is 1% precision over a square 50x50m<sup>2</sup> pixel. A 1.9% precision at 25x25m<sup>2</sup> nominal MethaneAIR pixel resolution does approximately correspond to 1% at the same spatial scale. To emphasize the spatial resolution difference the relevant sentence has been updated for clarity:

At this coarser spatial resolution the precision of MethaneAIR corresponds approximately to their 1 % precision case,

**RC:** *The paper itself is, in parts, slightly unstructured and jumps between topics. I point out some parts in the line-by-line comments but suggest introducing a few more subsections where the subject of the section covers multiple aspects.*

We have implemented the majority of suggestions in the line-by-line comments. The paper is long, which can make it feel like it does jump between topics. We have added a paragraph to the introduction to better guide the reader through the paper.

The road map for the rest of the paper is as follows; Section 2 describes the flight campaign, and Section 3 the retrieval methodology. Section 3 describes the method used for retrieval bias correction, needed due to drifts caused by impact of cabin temperature changes during flight. The MethaneAIR observations are validated against ground-based (EM27/Sun) and satellite (TROPOMI) retrievals in Section 4. The results of this validation are used to estimate the MethaneAIR detection limit for point sources, and further discuss challenges for the CH<sub>4</sub> emissions inversion problem at fine spatial scales based on the observations (Section 5). We highlight some case-studies from observations in the Permian in Section 6. Lastly, in Section 7 we discuss the implications for MethaneSAT.

### 3. Specific Comments

**RC:** *L32-44: This paragraph might fit better in the later parts of the introduction.*

**AR:** We respectfully disagree. We wanted to state the context early on that is motivating the overall project.

**RC:** *L56-57: I did not find anything in Lorente et al. about the 3% success rate, as well as the causes being the robustness of the full-physics approach. While satellite retrievals usually filter out more than 90% of the data, 3% seems low to me without a source. Additionally, how do the scientific algorithms perform?*

**AR:** I cited the retrieval paper rather than the review paper where this was mentioned (Section 2.2, Jacob et al. 2022) - I have fixed the citation to that.

Jacob, D. J., Varon, D. J., Cusworth, D. H., Dennison, P. E., Frankenberg, C., Gautam, R., Guanter, L., Kelley, J., McKeever, J., Ott, L. E., Poulter, B., Qu, Z., Thorpe, A. K., Worden, J. R., and Duren, R. M.: Quantifying methane emissions from the global scale down to point sources using satellite observations of atmospheric methane, *Atmospheric Chemistry and Physics*, 22, 9617–9646, <https://doi.org/10.5194/acp-22-9617-2022>, publisher: Copernicus GmbH, 2022.

**RC:** *L61/62: The instruments should be named, and MAMAP and GHG-Sat Airborne included and referenced. Additionally, a quick categorization apart from satellite/airborne would be helpful.*

**AR:** The instruments are now named explicitly (see response in Conceptual/Broader concerns). We could not find information about GHGSat-Airborne beyond website press releases. If the reviewer has a reference from the

scientific literature we will gladly cite it. With respect to the "quick categorization," the sentence following L61/62 captures the type of observation

Such instruments have increased pixel resolution (O(1-10 m) length scale) at the expense of spectral resolution (O(10 nm) vs O(0.1 nm) for global mappers). At these spatial scales CH<sub>4</sub> concentrations from plumes originating from point sources can be much higher than the atmospheric background, loosening the retrieval accuracy requirement.

If there is any additional fact pertinent to the discussion can the reviewer please specify.

**RC: L66/67: *The loosening of the retrieval accuracy is true. However, lower retrieval accuracy comes at the price of higher noise, false positives, and more substantial systematic errors.***

I don't think we are in disagreement - the paragraph states that the retrieval accuracy requirement for such sensors can be loosened for detecting plumes because they can spatially resolve the enhancements. The next paragraph explains the drawback of only targeting plumes, quoting the point source detection limits of such instruments. Implicit in these detection limits are the drawbacks you mention.

**RC: L92-94: *As the accuracy depends on the SNR (among others) and for smaller ground scenes at higher spectral resolution, the number of photons per detector pixel gets low, a source supporting that statement (e.g., simulation studies for MethaneSAT) would be helpful.***

AR: We now cite Jacob et al. (2022) which has a comparison in Table 1, The MethaneSAT numbers in that paper are based on a linear sensitivity analysis that was performed when defining the instrument measurement requirements. The ground pixel size was considered in the noise calculation for said analysis.

**RC: L114ff: *Have the polarization sensitivity measurements been evaluated already in a paper? Or is this planned? This could have a significant impact on the accuracy and precision.***

AR: We did attempt to do this during RF02 - linear polarizers used also created a lensing effect that caused additional defocusing. It was thus difficult to disentangle the polarization sensitivity from this additional bias. Based on instrument characterization performed from Headwall prior to delivery, the linear polarization sensitivity in the CH<sub>4</sub> band was around 5%, with little spectral variation. This would likely only lead to noticeable changes in signal for heavily polarizing reflectance conditions such as water glint, which we currently filter due to detector saturation. The complex polarization wavelength-dependence induced by aerosol/surface reflectance combinations may induce additional bias - when time permits, we do plan to remeasure the polarization sensitivity in lab, and assess potential errors through observing system simulation experiments, to fully assess this.

**RC: L131f: *The CO2 proxy method for methane for airborne measurements was first applied by Krings et al., 2011, which I suggest adding to the citation.***

AR: Citation added

**RC: L146: *The retrieval window for CO2 contains hardly any background information, which would be available in the longer wavelength range for both MethaneAIR and MethaneSAT. Why did you exclude those wavelength ranges?***

AR: Since the CO<sub>2</sub>/CH<sub>4</sub> windows are jointly optimized, the weaker band is actually included in the retrieval. There is a debate on whether it should be included because there could be a bias between the bands in the spectral database (pers. Comm. w/ MethaneSAT Science Advisory Group). Early in the project we tested fitting the windows independently and did not find a significant difference in the retrieval results, because the

band is too weak to impact the retrieved columns. This is discussed from L175 of the discussion paper.

**RC:** *L148f: Why do you assume that the higher spectral resolution will allow you to only measure from 1597 nm upwards? Did you do any simulations supporting this statement? Otherwise, my previous question is more urgent: Why did you choose not to include the background, especially in the longer wavelength range above 1618 nm?*

**AR:** The MethaneSAT band starts at 1597 nm (L146), but it has higher spectral resolution. The sentence states that the improved precision from this should partially offset not being able to include the extra 2 nm that are observable by MethaneAIR. I would attach a firm number to this but we are still evaluating the calibration results from TVAC.

Increasing the band width above 1618 does not yield additional information for constraining CO<sub>2</sub>, but could potentially require additional fit parameters (e.g. extra ISRF squeeze factors), which would degrade the quality of the retrieved CO<sub>2</sub> column. The additional state vector elements are well constrained with the current window (all DoFS = 1).

**RC:** *L178-L183: While this information is important, it breaks the retrieval description here. I suggest moving the paragraph to a more general “advantages of the retrieval” paragraph at the end of the section. Also, do I assume correctly that the forward model is absorption only? Or does it use aerosol assumptions without optimizing them?*

**AR:** It is already indicated that the model is absorption only (L176 of discussion). We replace "can be" with "is" to remove this confusion

Since the proxy method accounts for aerosols via normalization against  $N_{CO_2}$  as the light path constraint,  $F(x)$  does not consider scattering and is modeled analytically (Frankenberg et al., 2005).

**RC:** *L186: Does this mean you only optimize the troposphere in the retrieval, i.e., only below the aircraft? Would this change if you fly lower? And do you optimize the 13 levels separately? If yes, how does this work with only 1 – 1.5 DOF for CH<sub>4</sub>? And how do you optimize/treat water vapor?*

**AR:** I believe the line already states that the full profile is optimized

CH<sub>4</sub> and CO<sub>2</sub> profiles are optimized on a 19 layer vertical grid, consisting of 13 evenly spaced pressure layers from the surface to the tropopause, with a set of fixed pressure levels above.

The 1-1.5 DoFS arise from the a priori constraint to the profile, which specifies a vertical correlation structure between the levels (see Fig. S1). Water vapor is fit as a column scaling factor (Table 1).

**RC:** *L195: “can lead to significant impact on the light focus on the detector” – could you please clarify what you mean by this and why the F-number is important here?*

**AR:** The F-number is the ratio of the focal length to the aperture diameter of the entrance optic. It is a measure of the light collecting efficiency of the instrument. Small F-number instruments will capture more light, but are susceptible to defocusing. This is the result of the focal length in the entrance optics being relatively short, such that a small change in relative position of the optical components from say thermal expansion, can significantly move the system away from the ideal image point.

**RC:** *Table 1: The Albedo a priori is stated to be the MethaneAIR Radiance – averaged over which wavelength range? Also, an albedo uncertainty of 100% is very small for low albedos, e.g. 0.05, while it is pretty large*

*for typical albedos of 0.2-0.3. Is this on purpose? Finally, why do you include a radiance offset in the state vector, which is an additive offset, I assume?*

AR: A footnote has been added to Table 1 explaining how the radiance is used for the albedo calculation

Albedo estimated from 5-wavelength-pixel average centered at 1622.5 nm.

The coefficients from the Albedo DoFS are always  $\sim 1$  so in practice the variation does not have a large impact on the retrieval results. Low-albedo scenes are also removed by quality filtering.

The radiance offset is additive. It is included to account for broad-band stray light, which also appears to stem from the instrument defocusing issues. As one piece of evidence, we have observed detector signals in the unilluminated guard-pixel region correlating to retrieved squeeze factors.

**RC:** *Fig 3: Interestingly, the RMS after correction is lower at regions on the chip where the defocus is more prominent (as indicated by the larger Squeeze factor). While it aligns with the L1 prediction (how is it calculated from the radiance uncertainty?), it is still interesting that a lower resolution seems to perform better than a higher resolution (provocatively speaking).*

AR: The L1 prediction can be calculated from radiance uncertainty. The relationship between the observed  $y_i$  and modeled ( $F_i$ ) at wavelength pixel  $i$  is

$$y_i = F_i + \epsilon_i \quad (1)$$

$\epsilon_i$  is the radiance error, and is assumed normally distributed ( $\epsilon_i \sim \mathcal{N}(0, \sigma_i^2)$ ). The RMS (normalized by mean radiance  $\bar{y}$ ) is given as

$$RMS = \frac{1}{\bar{y}} \sqrt{\frac{1}{n} \sum_{i=1}^n (F_i - y_i)^2} \quad (2)$$

$$= \frac{1}{\bar{y}} \sqrt{\frac{1}{n} \sum_{i=1}^n (\epsilon_i)^2} \quad (3)$$

The predicted RMS is the expectation of the above

$$E[RMS(\epsilon)] \approx \frac{1}{\bar{y}} \sqrt{\frac{1}{n} E \left[ \sum_{i=1}^n (\epsilon_i)^2 \right]} \quad (4)$$

$$= \frac{1}{\bar{y}} \sqrt{\frac{1}{n} \sum_{i=1}^n E [(\epsilon_i)^2]} \quad (5)$$

$$= \frac{1}{\bar{y}} \sqrt{\frac{1}{n} \sum_{i=1}^n \sigma_i^2} \quad (6)$$

Equation 5 assumes that the  $\epsilon_i$  are independent of one another, and Equation 6 follows from the 2nd moment of the normal distribution. Moving the expectation operator (Equation 4) inside the square root basically assumes that the width of the distribution of the error residual sum ( $E [\sum_{i=1}^n (\epsilon_i)^2]$ ) is fairly narrow to not incur a large error. This is a reasonable to assume because of the large number of variables summed ( 500), so

one can make a argument based on the central limit theorem that the distribution should approach a narrow Gaussian. When making the estimate I quickly tested this by running 100 monte carlo trials and it produces almost identical results.

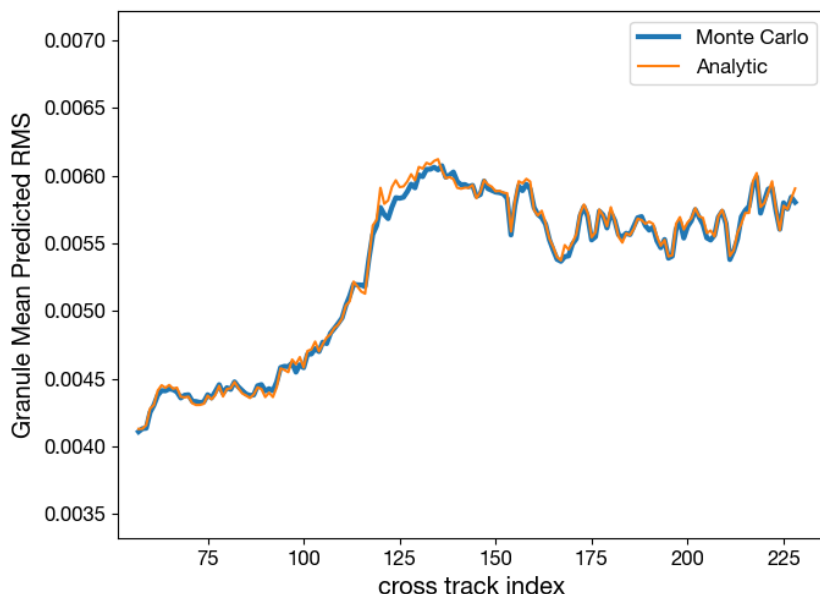

The RMS is lower in the regions of greater defocus, however the “L1 prediction” derived from the L1 radiance noise estimates also shows a similar trend - so this is likely related to the radiance pixel precision being better on that side of the detector.

**RC:** *L213ff: Why do you use the OCO-2 algorithm a priori uncertainties? Especially for H2O, I assume some difference in uncertainty between a satellite covering the whole earth with the natural variability of water vapor globally and the local variability of water vapor during an airborne remote sensing flight of 2 hours. The same holds for the surface pressure uncertainty. And why use the UoL GOSAT Proxy retrieval covariance matrices for the CH4 and CO2 profiles and not covariances derived from the GGG2020 Priori Profile Software results?*

**AR:** For H2O there is enough information to retrieve the column at the current a priori uncertainty, so relaxing it further would not appreciably change the results. We employ a high-resolution ( 20m) surface elevation database to adjust the GEOS-5 surface pressures. Based on our experience retrieving surface pressure from the O<sub>2</sub> band, it appears that this database is capable of accounting for small-scale variations in pressure. GGG2020 does not contain gas profile uncertainties, it only estimates background CO2/CH4. The actual GGG retrieval optimizes column scaling factors, so there is no information specifying vertical CH4/CO2 correlations required to adequately constrain the profile solution.

**RC:** *L244: “temperature changes can defocus light at the FPA” – what do you mean by that? A defocus of the image in the FPA plane? How does this happen mechanically?*

**AR:** The refractive indices of elements in the optical chain change with temperature, leading to a defocusing effect.



Thermal expansion can also change the relative positions of these elements, yielding a defocused image.

**RC:** *Figure 5: Interestingly, the largest biases and bias changes do not appear in the regions with the largest ISRF change. Or is this the bias, including the ISRF fit? Then, my question would be why the bias is largest in the area where the lowest correction was necessary.*

This is more likely to do with how we have defined the cross track bias. The baseline for the bias data in Figure 5 is the mean of all the  $XCH_4$  cross-track medians. Thus the data at the higher cross track indices may be closer to the truth, and everything else biased negatively. The general issue is that we cannot know the absolute  $XCH_4$  from the small-area approximation alone, so we must make some assumption, taking the mean being one of them. The idea of choosing the region with the lowest-correction is an interesting one though - we will likely evaluate it in the future.

**RC:** *Figure 6: First, I am curious about the dips/jumps in temperature. Do they correlate with some in-flight operations?*

**AR:** The dips correspond to the times where dark current measurements were taken for spectral calibration. This involved the operator applying the telescope lens caps manually, which disturbs the environment around the instrument. After the first campaign a shutter system was added to the system which removes these temperature blips.

**RC:** *Second, I suggest adding a shifted orange (dashed?) line to visualize the correlation better so that the steepest gradient overlaps with the temperature curve.*

**AR:** The actual value of the correlation is already shown in the inset, which is more quantitative than visually shifting the orange curve. Since the figure labels are small, I have updated these to show what the inset is more clearly.

**RC:** *L250: 10 s corresponds to approximately how many spectra? I.e., how robust is this median over, e.g., plumes? Do you do that as a running median, or each 10 s step is condensed to one median value?*

**AR:** 10s corresponds to 100 spectra, which covers a distance of 2km along-track. The median is performed stepwise i.e. once for each 10s segment. In most cases this is robust over plumes, however in unlucky scenarios such as when the plume is oriented in the flight direction this could cause a bias. However the point of doing the PLS regression, which locks the  $XCH_4$  bias correction to variations in the ISRF squeeze factors, is intended to remove such cases.

**RC:** *L254: “The relative  $XCH_4$  cross track bias is then derived by subtracting the mean of all the cross track background values.” I do not understand this. Can you provide a formula for the bias in cross track pixel  $i$  at time  $t$ ?*

Equations are added to the text for clarification

Let  $XCH_{4,g}(ix, it)$  be the retrieved  $XCH_4$  for 10 s segment  $g$  at cross/along track index  $ix$  and  $it$  respectively. The cross-track bias at cross track  $ix$  for the granule ( $B_g(ix)$ ) is estimated as follows:

$$XCH_{4,g}^{med}(ix) = \text{med}(XCH_{4,g}(ix, :))$$

$$B_g(ix) = XCH_{4,g}^{med}(ix) - \text{mean}(XCH_{4,g}^{med}(:))$$

In the above med and mean denote the median and mean respectively, and : denotes the array axis in which the operation is taken over.

**RC:** *L257: “is a common feature of other 2D grating spectrometers.” – please cite according examples.*

**AR:** Added example citations for MODIS, OMI, and TROPOMI

The relatively constant pattern is likely due to instrument slit inhomogeneities, and is a common feature of other 2D grating spectrometers (e.g. MODIS: Rakwatin et al. (2007), OMI: Boersma et al. (2011), and TROPOMI: Borsdorff et al. (2019)).

**RC:** *L259-263: The second ISRF PCA score has a totally different time evolution than the first ISRF PCA score. The same holds for the XCH4 PCA scores. Therefore, if the second ISRF PCA score has a similar correlation with both XCH4 PCA scores, I would be hesitant to call the correlation between the first components high. For completeness, what is the correlation between the first ISRF PCA score and the second XCH4 PCA score?*

**AR:** The Pearson  $r$  between the first ISRF PC score second XCH4 bias PC score is -0.40. The second PC does not have a significantly different time evolution if multiplied by  $-1$  (the sign of the score is somewhat arbitrary as you can multiply the score and PC by -1 to yield the same result). In this case the curves look similar but the peak in the second lagging by 2 hours. We are calling the coefficients high purely based on the Pearson correlation coefficients calculated from the scores.

**RC:** *Equation 5: Please expand this to include the complete formula from the pixel segments to the pixel bias.*

The current approach simply time interpolates the ISRF predicted bias in Figure 7. It is stated in the text

We have applied the bias correction for a given observation by temporally interpolating the PLS-derived bias (Figure 7, right panel) to the time of observation.

**RC:** *L258ff: It might be worth putting the across-track bias correction part (which you later also call “destriping”) into its own subsection and separating it from the general ISRF fit result analysis. Additionally, state clearly at the beginning that the bias correction is to remove across-track biases, i.e., stripes. Do you have to calculate each flight’s correction separately, or is the correction found for one RF sufficient?*

We have split the section into two segments - "Evidence of time-dependent cross track bias" and "MethaneAIR cross track bias correction algorithm"

**RC:** *Figure 8: While the correction largely removes the striping, there is still some residual track-to-track bias (and, in some cases, some residual stripes) left over. Did you quantify this?*

The residual drift is later quantified by the EM27/Sun comparison, where the influence of defocusing is noted

The summer flights showed a consistent positive  $XCH_4$  drift relative to the EM27/SUN retrievals, ranging from 0.9 ppb/h for RF09 to 3.1 ppb/h for RF08 (Figure 9, right panel). This drift correlates with the temperature-induced changes in the ISRF shown in the previous section (Figure 5). The drift is likely induced by the ISRF not being perfectly modeled by the ISRF squeeze factor. Since the time-evolution of the ISRF squeeze factors showed a similar pattern each flight, this could also explain why the sign of the drift was always positive.

In future flights we may consider allowing  $XCH_4$  drift in the PLS regression. This needs careful evaluation as it could subtract real variation if say the background was increasing in time.

**RC:** *L305f: How do you rescale the MethaneAIR retrievals with the EM27/SUN XCO<sub>2</sub>? Are you using the EM27 XCO<sub>2</sub> instead of the model XCO<sub>2</sub> in the proxy formula?*

**AR:** Correct, changed the line to state this explicitly:

To remove the influence of the GGG2020 CO<sub>2</sub> prior from the comparison, we use the XCO<sub>2</sub> observed by the EM27/SUN in place of GGG2020 when calculating the MethaneAIR XCH<sub>4</sub> from the retrieved vertical column densities (XCO<sub>2,0</sub>, Equation 1).

**RC:** *Figure 9, right side: are the lines and dots shifted such that the value is 0 for both dot and line at the first dot?*

**AR:** Yes - updated caption to explain this

The XCH<sub>4</sub> value at the time of the first overpass is subtracted from each dataset to visualize the relative drift.

**RC:** *L309: Please provide threshold values for the filters and how and why you chose these values.*

**AR:** Updated section with concrete numbers

Updated section with concrete numbers “MethaneAIR retrievals are also screened for poor spectral fits <sup>a</sup>, and low signal by rejecting pixels where CO<sub>2</sub> and CH<sub>4</sub> retrieval degrees of freedom for signal (DoFS) drop below 1, indicating a poor column constraint. Cloud-contaminated pixels are filtered using the algorithm in Section 3.4.”

<sup>a</sup>Values where the fit residual RMS is greater than 2% are excluded. This is at least 4 standard deviations from the median fit residual of properly converged results thus keeping the majority of good data, whilst removing excluding data from situations where the retrieval is expected to fail, such as over cloud shadows

**RC:** *L313f: “This could be partially due to different EM27/SUN spectrometers used...”: Should that not at least partly be mitigated by rescaling the retrieval with the EM27 XCO<sub>2</sub>?*

**AR:** In practice, scaling the MethaneAIR XCH<sub>4</sub> by EM27 XCO<sub>2</sub> scales the aircraft observations by the EM27 XCO<sub>2</sub> bias. To mitigate the effect of instrument-to-instrument differences the EM27 XCO<sub>2</sub> bias would need to be positively correlated with the EM27 XCH<sub>4</sub> bias. In general the scaling differences seem random instrument-to-instrument (See Alberti et al. (2022) EM27/Sun intercomparison, Figure 24).

**RC:** *L339: Why did you choose the standard V1 product, assuming you mean the operational product and not a newer version? As far as I know, significant improvements have been made since this version, and they might affect the comparison. Also, while the uncertainty due to the proxy normalization is sufficient to explain the bias, it might be that in the TROPOMI results, there is still a bias, which could either improve or worsen the comparison.*

**AR:** At the time of comparison that was the latest version (we have been slow to publish). The comparison with V1 was already quite good, and was intended as a sanity check for MethaneAIR rather than the other way around.

**RC:** *L358: Why use the a priori estimate and not the fitted albedo?*

AR: The albedo in the plot is the lambertian reflectance derived from the L1 radiance - In the non-scattering forward model the retrieved albedo is almost identical and would not change the conclusions drawn from the analysis.

RC: *P21, second paragraph: Likely, this paragraph makes much more sense once the optimal estimator and regularization are named. However, as of now, it is a bit confusing, as it is not fully clear what the goal of the paragraph is.*

AR: We are only saying that the results below that albedo will be heavily influenced by the prior due reduced signal. We have changed the phrasing to make this clearer.

This bias is due to cloud shadows, as well as other low-signal scenes such as those over water, where the retrieved  $XCH_4$  is heavily influenced by the a priori information.

RC: *Heading to 6.1: In this paragraph, additionally, IME is partly introduced, which should somehow be either reflected in the heading or, preferably, the introduction to IME is moved to a separate subsection.*

AR: We only introduce the IME method here because it is needed to discuss the reasons for choosing the total variance filter as part of the plume masking algorithm. The section only covers plume masking and point source detection limits.

RC: *L400: It sounds like the filter was already implemented by Frankenberg et al., 2016 and Varon et al., 2018, which, to my knowledge, is not the case. Is there a source where the advantages of this filter to IME are studied? If not, please provide some context for why it is advantageous here.*

AR: The additional image-processing filter is required as we do not spatially resolve the plumes as well as the aforementioned sensors (pixel size  $O(10m)$  instead of  $O(1m)$  - at the finer scale the plumes are more apparent, whereas at the scale of MethaneAIR the plumes themselves are comparable in magnitude with the instrument single-pixel precision. However, since the retrievals do not have systematic biases near the magnitude of the AVIRIS-like sensors, this permits the sort of spatial-averaging that the image-processing filter applies, to reveal coherent plume structures that can then be masked for use with the IME method.

RC: *L406:  $U_{eff}$  is, to my knowledge, determined from the  $u_{10}$  10-meter wind from models. This is done via LES, but not for each target scene, at least in the papers you cited. Also, the MethaneAIR inversion paper (Chulakadabba et al., 2023, disc) states that  $u_{eff}$  is a function of  $\log(U_{10}) + 0.6$ . Please also cite Chulakadabba at the first mention of the IME approach applied here.*

Yes you are correct for the standard IME method - the relationship between  $U_{10}$  and  $U_{eff}$  is determined from an ensemble of LES simulations not for the specific target. In the approach used for MethaneAIR (Chulakadaba et al., 2023) the  $U_{10}$  used in this calculation is actually that calculated as the RMS of the 10m wind speed from an LES simulation of the target  $\pm 15$  minutes either side of the observation time. Based on comparisons with the controlled releases from RF04/RF05, this approach outperformed using the met product used for the LES models boundary conditions, and the actual wind speed measured at the site. We have updated the paragraph to clarify this

Here the *IME* is the integrated  $CH_4$  mass of the plume. The effective wind speed  $u_{eff}$  and plume length scale  $L$  are parameters that account for impacts of turbulent diffusion on the observed plume extent.  $L$  is estimated by taking the square root of the plume area. In practice  $u_{eff}$  is determined from an ensemble of large eddy simulations as a function of the 10m wind horizontal wind speed ( $u_{10}$ ). For MethaneAIR,  $u_{10}$  is itself determined by a LES simulation of the target of scene at the time of

observation (Chulakadaba et al., 2023).

**RC:** *L411f: What is the “3-sigma iteratively clipped mean”?*

**AR:** It is a sigma-clipped mean - just a robust estimator for the actual mean, which I thought was widely known e.g. [https://www.gnu.org/software/gnuastro/manual/html\\_node/Sigma-clipping.html](https://www.gnu.org/software/gnuastro/manual/html_node/Sigma-clipping.html)

**RC:** *P23 last line: Please include the curves for the native resolution, maybe in the supplement.*

**AR:** Added to supplement

**RC:** *L435-439: While this is a real consideration, the longer plume detection raises additionally the question of how to treat plumes cut off by the swath edge in the IME approach like the plumes in Fig. 19. This gets additionally important for highly variable plumes or puff releases.*

Correct. Currently plumes cut at the edge of the swath are underestimated by the IME method for obvious reasons. We currently just acknowledge these as source detections rather than quantifications. The problem with puff releases is discussed later in the section. The overall intention of the section is to highlight these unintended emission inversion challenges that come out of having a detector with both relatively high spatial resolution and precision.

**RC:** *L458: This is a very strong statement, especially as no MethaneSAT data yet exists. I suggest rephrasing that such detached plumes should be detectable by MethaneSAT.*

**AR:** Updated:

We see here that they are observable by MethaneAIR and should be detectable by MethaneSAT.

**RC:** *After Line 460, I suggest the beginning of a separate subsection, as this is a significant point of the paper.*

**AR:** Added subsection heading: “Estimation of MethaneAIR’s Point Source Detection Limit”

**RC:** *Figure 17: Please enlarge the red cross, and maybe color it differently (possibly black), as it is hardly visible and due to the blue in the figure also slightly hurting the eyes. Similarly, the red triangles in the Google Earth overlay are hardly visible. Maybe mark the whole region of compressors with a box?*

Changed x to white with black outline based on this stack overflow post. The red box bounding the compressors has been added to the figure as suggested.

**RC:** *L464: You state that the lower resolution of the simulation will lead to an overly pessimistic estimate of the detection limit. What is the reason for that?*

**AR:** Effectively the simulation is lower resolution than the data - the plume is artificially smoothed by this. Thus the enhancements above the background that are detectable will also be harder to detect, purely as a result of the simulation being coarser than what can be resolved by the sensor.

**RC:** *L466: Why do you assume such a low wind speed? The detection limit is linked to wind speed, too, and wind speeds of 5 m/s and higher are not unusual, especially in cloud-free conditions over sand or shrubland, not uncommon for O<sub>2</sub> production sites.*

**AR:** The WRF simulations were performed for the controlled release study in Chulakadaba et al. (2023). That happened to be the wind speed. To first order, the concentration field (and hence detection limit) will scale linearly with wind speed (under the simple assumption of advection-only transport), implying all else being

equal, a detection limit of 260 kg/h at 5 ms<sup>-1</sup>. However as you mentioned vertical stability and surface roughness are going to complicate this estimate due to their impact on turbulent transport.

**RC:** *L467: How exactly do you scale the plume sample? Do you multiply the base emission and all XCH4 values by the same constant? Is this realistic?*

**AR:** This is exactly what would happen in the LES simulation if it were run identically with the emission rate scaled by the same constant. The model is linear this way.

**RC:** *L483: What is the uncertainty range on the 75% number of detectable sources? As this is quite a high number, and the wind speed uncertainty alone accounts for 15-50%, plus 70 kg h-1 emission uncertainty, which for sources near the detection limit is also nearing 50%, I assume this number should have quite a substantial uncertainty.*

**AR:** Not the fraction of detectable sources - the fraction of total OG CH4 emissions that are theoretically detectable as point sources, as indicated in the text. Tautologically, larger sources are going to contribute more to the total emissions. This is why the 75% number appears high. It is also subject to the uncertainty in the EPA USGGRP estimates - however it is the best bottom-up source for the entire US that we currently have found. This is also already acknowledged in the paragraph.

**RC:** *L500: Is there a reason why Frankenberg et al 2016 is not on the list, as you cited it already in other places?*

**AR:** I have added it

**RC:** *L503f: This is a very interesting thought. How many overpasses would you think it needs to assess that the emissions are stable enough to reduce revisiting times?*

**AR:** We need regular basin monitoring to answer this question. Ultimately we are interested in how total basin emissions are trending over time. The more variable each successive basin emissions estimate is, the more uncertain we are in the current mean emissions from the basin, implying the need for more frequent observation. Hypothetically, one could estimate the minimum sampling frequency by considering the current sample variance, and defining a minimum threshold trend that is needed to be detected over a specified time range. For a given sampling frequency one could then define a linear model over the time range, with the given minimum slope and data variance, and via a t-test determine if this would be statistically significant. As of now this is not in the target scheduling plan but it might be an interesting idea.

**RC:** *L509: Which of the nine overpasses do you consider covering the plume fully? In Fig. 19, I see six plumes I would consider “cut off” and only three plumes fully sampled.*

**AR:** Originally I considered RF06 Passes 2,3,4,5 and RF07 2,3 - the swath slightly cuts off the enhancements above background in some of these, but their emission rates are reasonably consistent. The comment was made to explain that RF06 overpasses 1 and 7 have lower emissions estimates due to poor observation overlap. I have changed to the text clarify:

The estimated emissions were persistent and large, ranging from 1914–2572 kg/h upon excluding RF06 16:15 and RF07 17:11 due to poor observational coverage of the target site.

**RC:** *L530: While true, such large persistent leaks have also been detected by TROPOMI, GHGSat, and EMIT, e.g., in Turkmenistan. Therefore, it enhances the capabilities to inform operators but is not the only instrument for that, which is implied by the statement.*

AR: Updated to:

This case demonstrates that even large-magnitude leaks can go undetected for long periods of time, and suggests that through regular OG basin monitoring, MethaneSAT will provide an important addition to the existing network of satellites capable of detecting large methane leaks (Irakulis-Loitxate et al., 2022), and help contribute to their mitigation through international activities such as the Methane Alert and Response System (UNEP, 2023).

**RC:** *Figure 20: Was this plume recorded in one go, or has it been sampled over multiple tracks? If the latter is the case, over which time frame was the plume recorded, and how do you treat the wind in this case for the emission estimate?*

AR: The plume was sampled over 3 successive overpasses approximately perpendicular to the plume orientation, intersecting at approximately 15-20 minute intervals. The IME was derived from this data after it was combined and regridded at a resolution of  $\sim 10 \times 10\text{m}^2$ . The effective wind speed was estimated from the 10-m RMS wind speed from an LES simulation at the time of the overpass corresponding to the pipeline leak location. In practice this effective wind will work better for smaller plumes - when the plume becomes larger the  $U_{eff}$  may not be representative of that downwind, and additional internal eddy structures deep within the plume will not necessarily aid in its dissipation, causing the LES to underestimate the plume lifetime. We do note however that the confidence interval of the IME (5700-6500 kg/h) is within that derived using the divergence integral approach (5600-5700 kg/h, see Chulakadaba et al. (2023)) which should be less susceptible to errors caused by the larger spatial extent of the plume.

**RC:** *L533: “the operational MethaneSAT” – please add “designated” as MethaneSAT is not flying yet.*

AR: Changed to: “Here we have described the retrieval algorithm designated for MethaneSAT”

**RC:** *L545f: Does this assume purely random noise? What about systematic effects that cannot be reduced by averaging?*

AR: Yes we are referring to random error, hence why precision is used in the sentence.

#### 4. Technical Corrections/Typos

**RC:** *L220: “clouds with high-optical”: here a word seems to be missing*

AR: Corrected to “high optical depths”

**RC:** *L237: “... is the mean ...”: “The” missing*

AR: corrected

**RC:** *L264: mechanistically sounds strange here – do you mean “directly”?*

AR: Both the change in ISRF width and CH<sub>4</sub> bias are both emergent properties caused by the defocusing of the instrument. The term mechanistically was meant in the scientific sense, whereby a mechanism is understood as a system of “causally interacting parts and processes that produce one or more effects.” To avoid confusion I have changed the sentence to

Since there is an underlying physical connection between the XCH4 cross-track bias and ISRF squeeze parameters, ...

**RC:** *L267: please replace “(top right)” with the according subfigure number*

AR: Top right – > c2 (was referencing an older version of figure)

**RC:** *L299: “2-3 hours of MethaneAIR observations” – please add at which altitude, as this determines the swath width.*

AR: Added “at its nominal 12km above-ground observation altitude.”

**RC:** *Figure 12: Typo in the caption: “wiht” -> with*

AR: Fixed

**RC:** *Figure 14: Label and ticks of the y-axis on the right plot are covered*

AR: Fixed

**RC:** *L511: There is no reference in the bibliography for the US EPA GHG reporting program, or it is not listed under this name.*

AR: Citation to EPA GHGRP URL added (GHGRP)

**RC:** *L512: The study’s measurements were taken ten years ago, and the paper was published eight years ago, so please remove the “recent”.*

AR: Done

**RC:** *L525: Please give the 2.7 Tg a-1 also in kg h-1 for better comparison with the other values in the paragraph.*

AR: Typically basinwide totals as Gg/a or Tg/a, and plume sources in kg/h. Converting to kg/h yields 3.1e6 kg/h which seems a bit unwieldy. The purpose of the sentence was just to put into perspective the size of the source relative to the basin, which we also indicate as a percentage.

**RC:** *L543/544: two times “strong”*

AR: Fixed

## References

Alberti, C., Hase, F., Frey, M., Dubravica, D., Blumenstock, T., Dehn, A., Castracane, P., Surawicz, G., Harig, R., Baier, B. C., Bès, C., Bi, J., Boesch, H., Butz, A., Cai, Z., Chen, J., Crowell, S. M., Deutscher, N. M., Ene, D., Franklin, J. E., García, O., Griffith, D., Grouiez, B., Grutter, M., Hamdouni, A., Houweling, S., Humpage, N., Jacobs, N., Jeong, S., Joly, L., Jones, N. B., Jouglet, D., Kivi, R., Kleinschek, R., Lopez, M., Medeiros, D. J., Morino, I., Mostafavipak, N., Müller, A., Ohyama, H., Palmer, P. I., Pathakoti, M., Pollard, D. F., Raffalski, U., Ramonet, M., Ramsay, R., Sha, M. K., Shiomi, K., Simpson, W., Stremme, W., Sun, Y., Tanimoto, H., Té, Y., Tsidu, G. M., Velazco, V. A., Vogel, F., Watanabe, M., Wei, C., Wunch, D., Yamasoe, M., Zhang, L., and Orphal, J.: Improved calibration procedures for the EM27/SUN spectrometers of the



- COLlaborative Carbon Column Observing Network (COCCON), Atmospheric Measurement Techniques, 15, 2433–2463, , publisher: Copernicus GmbH, 2022.
- Boersma, K. F., Eskes, H. J., Dirksen, R. J., van der A, R. J., Veefkind, J. P., Stammes, P., Huijnen, V., Kleipool, Q. L., Sneep, M., Claas, J., Leitão, J., Richter, A., Zhou, Y., and Brunner, D.: An improved tropospheric NO<sub>2</sub> column retrieval algorithm for the Ozone Monitoring Instrument, Atmospheric Measurement Techniques, 4, 1905–1928, , 2011.
- Borsdorff, T., aan de Brugh, J., Schneider, A., Lorente, A., Birk, M., Wagner, G., Kivi, R., Hase, F., Feist, D. G., Sussmann, R., Rettinger, M., Wunch, D., Warneke, T., and Landgraf, J.: Improving the TROPOMI CO data product: update of the spectroscopic database and destripping of single orbits, Atmospheric Measurement Techniques, 12, 5443–5455, , 2019.
- Butz, A., Hasekamp, O. P., Frankenberg, C., Vidot, J., and Aben, I.: CH<sub>4</sub> retrievals from space-based solar backscatter measurements: Performance evaluation against simulated aerosol and cirrus loaded scenes, Journal of Geophysical Research: Atmospheres, 115, , \_eprint: <https://onlinelibrary.wiley.com/doi/pdf/10.1029/2010JD014514>, 2010.
- Chulakadaba, A., Maryann, Sargent, Lauvaux, Thomas, Benmergui, Joshua S., Franklin, Jonathan E., Chan Miller, Christopher, Wilzewski, Jonas, Roche, SV{e}bastien, Conway, Eamon, Souri, Amir H., Sun, Kang, Luo, Bingkun, Hawthorne, Jacob, Samra, Jenna, Daube, Bruce C., Liu, Xiong, Chance, Kelly, Li, Yang, Gautam, Ritesh, Omara, Mark, Rutherford, Jeff S., Sherwin, Evan D., Brandt, Adam, and Wofsy, Steve: Methane Point Source Quantification Using MethaneAIR: A New Airborne Imaging Spectrometer, Atmospheric Measurement Techniques (submitted), 2023.
- Frankenberg, C., Platt, U., and Wagner, T.: Iterative maximum a posteriori (IMAP)-DOAS for retrieval of strongly absorbing trace gases: Model studies for CH<sub>4</sub> and CO<sub>2</sub> retrieval from near infrared spectra of SCIAMACHY onboard ENVISAT, Atmospheric Chemistry and Physics, 5, 9–22, , publisher: Copernicus GmbH, 2005.
- Gerilowski, K., Tretner, A., Krings, T., Buchwitz, M., Bertagnolio, P. P., Belemzov, F., Erzinger, J., Burrows, J. P., and Bovensmann, H.: MAMAP – a new spectrometer system for column-averaged methane and carbon dioxide observations from aircraft: instrument description and performance analysis, Atmospheric Measurement Techniques, 4, 215–243, , 2011.
- GHGRP: U.S. EPA Greenhouse Gas Reporting Program (GHGRP), URL <https://www.epa.gov/ghgreporting>.
- Guanter, L., Irakulis-Loitxate, I., Gorroño, J., Sánchez-García, E., Cusworth, D. H., Varon, D. J., Cogliati, S., and Colombo, R.: Mapping methane point emissions with the PRISMA spaceborne imaging spectrometer, Remote Sensing of Environment, 265, 112 671, , 2021.
- Hochstaffl, P., Schreier, F., Köhler, C. H., Baumgartner, A., and Cerra, D.: Methane retrievals from airborne HySpex observations in the shortwave infrared, Atmospheric Measurement Techniques, 16, 4195–4214, , 2023.
- Irakulis-Loitxate, I., Guanter, L., Maasackers, J. D., Zavala-Araiza, D., and Aben, I.: Satellites Detect Abatable Super-Emissions in One of the World’s Largest Methane Hotspot Regions, Environmental Science & Technology, 56, 2143–2152, , pMID: 35102741, 2022.

- Jacob, D. J., Varon, D. J., Cusworth, D. H., Dennison, P. E., Frankenberg, C., Gautam, R., Guanter, L., Kelley, J., McKeever, J., Ott, L. E., Poulter, B., Qu, Z., Thorpe, A. K., Worden, J. R., and Duren, R. M.: Quantifying methane emissions from the global scale down to point sources using satellite observations of atmospheric methane, *Atmospheric Chemistry and Physics*, 22, 9617–9646, , publisher: Copernicus GmbH, 2022.
- Jervis, D., McKeever, J., Durak, B. O. A., Sloan, J. J., Gains, D., Varon, D. J., Ramier, A., Strupler, M., and Tarrant, E.: The GHGSat-D imaging spectrometer, *Atmospheric Measurement Techniques*, 14, 2127–2140, , publisher: Copernicus GmbH, 2021.
- Krautwurst, S., Gerilowski, K., Jonsson, H. H., Thompson, D. R., Kolyer, R. W., Iraci, L. T., Thorpe, A. K., Horstjann, M., Eastwood, M., Leifer, I., Vigil, S. A., Krings, T., Borchardt, J., Buchwitz, M., Fladeland, M. M., Burrows, J. P., and Bovensmann, H.: Methane emissions from a Californian landfill, determined from airborne remote sensing and in situ measurements, *Atmospheric Measurement Techniques*, 10, 3429–3452, , 2017.
- Krings, T., Gerilowski, K., Buchwitz, M., Reuter, M., Tretner, A., Erzinger, J., Heinze, D., Pflüger, U., Burrows, J. P., and Bovensmann, H.: MAMAP – a new spectrometer system for column-averaged methane and carbon dioxide observations from aircraft: retrieval algorithm and first inversions for point source emission rates, *Atmospheric Measurement Techniques*, 4, 1735–1758, , 2011.
- Krings, T., Neininger, B., Gerilowski, K., Krautwurst, S., Buchwitz, M., Burrows, J. P., Lindemann, C., Ruhtz, T., Schüttemeyer, D., and Bovensmann, H.: Airborne remote sensing and in situ measurements of atmospheric CO<sub>2</sub> to quantify point source emissions, *Atmospheric Measurement Techniques*, 11, 721 – 739, , 2018.
- Rakwatin, P., Takeuchi, W., and Yasuoka, Y.: Stripe Noise Reduction in MODIS Data by Combining Histogram Matching With Facet Filter, *IEEE Transactions on Geoscience and Remote Sensing*, 45, 1844–1856, , 2007.
- Roger, J., Irakulis-Loitxate, I., Valverde, A., Gorroño, J., Chabrillat, S., Brell, M., and Guanter, L.: High-resolution methane mapping with the EnMAP satellite imaging spectroscopy mission, *IEEE Transactions on Geoscience and Remote Sensing*, pp. 1–1, , 2024.
- Shivers, S., Guido, J., Duren, R., Asner, G., Green, R. O., Ardila, D. R., Ayasse, A., Belloy, M. d., Cusworth, D., Lai-Norling, J., Lawrence, R., Mason, J., Rao, S., Gordon, D., Seaman, K., and Thorpe, A. K.: Carbon Mapper: A New Public-Private Hyperspectral Constellation, AGU, URL <https://agu.confex.com/agu/fm21/meetingapp.cgi/Paper/915730>, 2021.
- Sierk, B., Bézy, J.-L., Löscher, A., and Meijer, Y.: The European CO<sub>2</sub> Monitoring Mission: observing anthropogenic greenhouse gas emissions from space, in: *International Conference on Space Optics — ICSO 2018*, edited by Sodnik, Z., Karafolas, N., and Cugny, B., vol. 11180, p. 111800M, International Society for Optics and Photonics, SPIE, , 2019.
- Thorpe, A. K., Roberts, D. A., Dennison, P. E., Bradley, E. S., and Funk, C. C.: Point source emissions mapping using the Airborne Visible/Infrared Imaging Spectrometer (AVIRIS), in: *Algorithms and Technologies for Multispectral, Hyperspectral, and Ultraspectral Imagery XVIII*, vol. 8390, pp. 302–310, SPIE, , 2012.
- Thorpe, A. K., Frankenberg, C., Aubrey, A. D., Roberts, D. A., Nottrott, A. A., Rahn, T. A., Sauer, J. A., Dubey, M. K., Costigan, K. R., Arata, C., Steffke, A. M., Hills, S., Haselwimmer, C., Charlesworth, D., Funk, C. C., Green, R. O., Lundeen, S. R., Boardman, J. W., Eastwood, M. L., Sarture, C. M., Nolte,

S. H., Mccubbin, I. B., Thompson, D. R., and McFadden, J. P.: Mapping methane concentrations from a controlled release experiment using the next generation airborne visible/infrared imaging spectrometer (AVIRIS-NG), *Remote Sensing of Environment*, 179, 104–115, , 2016.

UNEP: An Eye on Methane — The road to radical transparency: International Methane Emissions Observatory, URL <https://www.unep.org/resources/report/eye-methane-international-methane-emissions-observatory-2023-report>, 2023.

Varon, D. J., Jervis, D., McKeever, J., Spence, I., Gains, D., and Jacob, D. J.: High-frequency monitoring of anomalous methane point sources with multispectral Sentinel-2 satellite observations, *Atmospheric Measurement Techniques*, 14, 2771–2785, , 2021.
